# Supplementary material for: Epistasis regulates genetic control of cardiac hypertrophy
Source: Research Square preprint supplement (doi:10.21203/rs.3.rs-3509208/v1), 2023-11-20
Supplement: Supplementary file 1 [file 52a0f7b3fb4792b04a9f511c.xlsx]

## Sheet: Cell_size
Relative changes in cardiomyocyte cell diameter comparing between different gene-silencing conditions and the scramble control for both healthy cells and cells carrying the MYH7-R403Q variant, a variant known to cause hypertrophic cardiomyopathy (HCM). Rows corresponding to silenced gene pairs are highlighted in green. Cell line: whether healthy or diseased (HCM) cells Gene silencing condition: t…
Cell line	Gene silencing condition	Quantile	Relative change in cell size (relative to scramble control)	STD	P-value (bootstrap quantile test)	P-value (Wilcoxon test for the median)	Non-additivity p-value (bootstrap quantile regression t-test)	Non-additivity p-value (quantile regression t-test)
Healthy	CCDC141-IGF1R	0.5	-0.0932212	0.00455974	<1.00E-4	2.54e-62	<1.00E-4	5.58e-06
Healthy	CCDC141-TTN	0.5	-0.0580048	0.00555448	<1.00E-4	6.74e-12	<1.00E-4	0.014
Healthy	CCDC141	0.5	0.0171346	0.00385517	0.0232	0.205	--	--
Healthy	IGF1R	0.5	-0.0661128	0.00524948	<1.00E-4	1.72e-19	--	--
Healthy	TTN	0.5	-0.0583497	0.00574052	<1.00E-4	0.000726	--	--
HCM	CCDC141-IGF1R	0.5	-0.0853484	0.00255418	<1.00E-4	6e-44	<1.00E-4	<1.00E-16
HCM	CCDC141-TTN	0.5	-0.0329587	0.00391625	<1.00E-4	3.83e-13	<1.00E-4	<1.00E-16
HCM	CCDC141	0.5	-0.0314584	0.00457541	<1.00E-4	4.91e-05	--	--
HCM	IGF1R	0.5	-0.0531977	0.00367899	<1.00E-4	1.87e-22	--	--
HCM	TTN	0.5	-0.0165734	0.00445452	0.8554	0.038	--	--
Healthy	CCDC141-IGF1R	0.6	-0.102983	0.004	<1.00E-4	--	<1.00E-4	1.25e-13
Healthy	CCDC141-TTN	0.6	-0.0502012	0.0049	<1.00E-4	--	0.1376	0.0636
Healthy	CCDC141	0.6	0.0250945	0.0038	0.0052	--	--	--
Healthy	IGF1R	0.6	-0.0574058	0.005	<1.00E-4	--	--	--
Healthy	TTN	0.6	-0.0527383	0.0054	0.0012	--	--	--
HCM	CCDC141-IGF1R	0.6	-0.101535	0.0028	<1.00E-4	--	<1.00E-4	1.04e-13
HCM	CCDC141-TTN	0.6	-0.0408813	0.0044	<1.00E-4	--	<1.00E-4	2.01e-10
HCM	CCDC141	0.6	-0.0283654	0.0052	0.0006	--	--	--
HCM	IGF1R	0.6	-0.0602652	0.004	<1.00E-4	--	--	--
HCM	TTN	0.6	-0.0248167	0.0048	0.2026	--	--	--
Healthy	CCDC141-IGF1R	0.7	-0.109207	0.0043	<1.00E-4	--	<1.00E-4	<1.00E-16
Healthy	CCDC141-TTN	0.7	-0.0498032	0.0053	<1.00E-4	--	<1.00E-4	0.00023
Healthy	CCDC141	0.7	0.0191585	0.0042	0.0132	--	--	--
Healthy	IGF1R	0.7	-0.0535295	0.005	<1.00E-4	--	--	--
Healthy	TTN	0.7	-0.0394875	0.006	0.9112	--	--	--
HCM	CCDC141-IGF1R	0.7	-0.119495	0.003	<1.00E-4	--	0.0798	0.0936
HCM	CCDC141-TTN	0.7	-0.0500148	0.0047	<1.00E-4	--	0.0001	0.00042
HCM	CCDC141	0.7	-0.0167918	0.006	0.743	--	--	--
HCM	IGF1R	0.7	-0.0656668	0.0044	<1.00E-4	--	--	--
HCM	TTN	0.7	-0.0368005	0.0051	<1.00E-4	--	--	--
Healthy	CCDC141-IGF1R	0.8	-0.11418	0.0048	<1.00E-4	--	<1.00E-4	<1.00E-16
Healthy	CCDC141-TTN	0.8	-0.0496978	0.0056	<1.00E-4	--	<1.00E-4	5.64e-06
Healthy	CCDC141	0.8	0.00745804	0.0046	0.8848	--	--	--
Healthy	IGF1R	0.8	-0.0468487	0.0061	<1.00E-4	--	--	--
Healthy	TTN	0.8	-0.0182743	0.0071	0.0006	--	--	--
HCM	CCDC141-IGF1R	0.8	-0.136185	0.0032	<1.00E-4	--	0.381	0.438
HCM	CCDC141-TTN	0.8	-0.0569065	0.0049	<1.00E-4	--	<1.00E-4	0.000102
HCM	CCDC141	0.8	-0.0147312	0.0061	0.8882	--	--	--
HCM	IGF1R	0.8	-0.0748987	0.0042	<1.00E-4	--	--	--
HCM	TTN	0.8	-0.0479647	0.0055	<1.00E-4	--	--	--
Healthy	CCDC141-IGF1R	0.9	-0.122484	0.0054	<1.00E-4	--	<1.00E-4	<1.00E-16
Healthy	CCDC141-TTN	0.9	-0.0491704	0.0062	<1.00E-4	--	<1.00E-4	1.31e-13
Healthy	CCDC141	0.9	-0.0112042	0.005	0.7898	--	--	--
Healthy	IGF1R	0.9	-0.0417778	0.0063	0.0024	--	--	--
Healthy	TTN	0.9	0.0112656	0.0072	0.0002	--	--	--
HCM	CCDC141-IGF1R	0.9	-0.14239	0.0036	<1.00E-4	--	<1.00E-4	1.34e-10
HCM	CCDC141-TTN	0.9	-0.0632198	0.0048	<1.00E-4	--	<1.00E-4	2.18e-13
HCM	CCDC141	0.9	-0.0213657	0.0055	0.1358	--	--	--
HCM	IGF1R	0.9	-0.083513	0.0044	<1.00E-4	--	--	--
HCM	TTN	0.9	-0.0598252	0.0053	<1.00E-4	--	--	--

## Sheet: Textural_irregularity
Relative changes in cardiomyocyte textural irregularity comparing between different gene-silencing conditions and the scramble control values for both healthy cells and cells carrying the MYH7-R403Q variant, a variant known to cause hypertrophic cardiomyopathy (HCM). Rows corresponding to silenced gene pairs are highlighted in green. Cell line: whether healthy or diseased (HCM) cells Gene silenci…
Cell line	Gene silencing condition	Relative change in median cell textual irregularity (relative to scramble control)	STD	P-value (bootstrap quantile test)	P-value (Wilcoxon test)	Non-additivity p-value (bootstrap quantile regression t-test)	Non-additivity p-value (quantile regression t-test)
Healthy	CCDC141-IGF1R	0.102608	0.00849905	<1.00E-4	3.96e-27	<1.00E-4	0.0084
Healthy	CCDC141-TTN	0.0725962	0.00792574	<1.00E-4	1.24e-12	0.243	0.26
Healthy	CCDC141	-0.0209737	0.00470004	0.879	0.427	--	--
Healthy	IGF1R	0.076016	0.00761527	<1.00E-4	1.24e-14	--	--
Healthy	TTN	0.0636017	0.00841091	0.0016	1.24e-05	--	--
HCM	CCDC141-IGF1R	0.090095	0.00447934	<1.00E-4	6.06e-15	<1.00E-4	2.31e-15
HCM	CCDC141-TTN	0.0279588	0.00648549	0.0044	6.12e-05	0.121	0.0231
HCM	CCDC141	0.0183502	0.00646674	0.0796	0.0327	--	--
HCM	IGF1R	0.0505135	0.00687667	<1.00E-4	3.56e-07	--	--
HCM	TTN	0.00909091	0.00614628	0.897	0.649	--	--

## Sheet: Boundary_irregularity
Relative changes in cardiomyocyte boundary irregularity comparing between different gene-silencing conditions and the scramble control values for both healthy cells and cells carrying the MYH7-R403Q variant, a variant known to cause hypertrophic cardiomyopathy (HCM). Rows corresponding to silenced gene pairs are highlighted in green. Cell line: whether healthy or diseased (HCM) cells Gene silenci…
Cell line	Gene silencing condition	Relative change in median cell boundary irregularity (relative to scramble control)	STD	P-value (bootstrap quantile test)	P-value (Wilcoxon test)	Non-additivity p-value (bootstrap quantile regression t-test)	Non-additivity p-value (quantile regression t-test)
Healthy	CCDC141-IGF1R	0.0469049	0.00631426	0.0128	0.00013	0.0606	0.0496
Healthy	CCDC141-TTN	-0.000248489	0.0062451	0.4732	0.2708	<1.00E-4	3e-07
Healthy	CCDC141	-0.0115303	0.00704918	0.4004	0.1397	--	--
Healthy	IGF1R	0.0066543	0.00624775	0.925	0.688	--	--
Healthy	TTN	0.0286802	0.0042453	0.0036	0.0018	--	--
HCM	CCDC141-IGF1R	0.0102359	0.00458784	0.4374	0.615	<1.00E-4	<1.00E-16
HCM	CCDC141-TTN	0.00632476	0.00449521	0.2764	0.2161	<1.00E-4	0.00244
HCM	CCDC141	-0.00313205	0.00408113	0.7432	0.7204	--	--
HCM	IGF1R	-0.001104	0.00441052	0.33	0.7436	--	--
HCM	TTN	-0.0222151	0.00533383	0.2434	0.2108	--	--
