# Supplementary material for: Epistasis regulates genetic control of cardiac hypertrophy
Source: Research Square preprint supplement (doi:10.21203/rs.3.rs-3509208/v1), 2023-11-20
Supplement: Supplementary file 5 [file 9721e90d9b8f069373428181.xlsx]

## Sheet: PLINK LVMi - Risk Loci
List of left ventricular mass index (LVMi) risk loci prioritized from a traditional FUMA GWAS study using PLINK with a genome-wide significance threshold of p = 5E-8. Genomic Locus: unique locus identifier uniqID: unique identifier of the SNV, defined as chr:hg19 position:allele1:allele2 where alleles are alphabetically ordered rsID: rsID of the top lead SNV for the given genomic locus chr: chrom…
GenomicLocus	uniqID	rsID	chr	pos	p	start	end	nGWASSNVs	nIndSigSNVs	IndSigSNVs	nLeadSNVs	LeadSNVs
1	2:179562999:C:CTTAG	rs3045696	2	179562999	1.46243e-13	179284643	179793839	184	9	rs3045696;rs62178977;rs10178003;rs12622500;rs73973171;rs7591091;rs1863671;rs967507;rs1873164	2	rs3045696;rs1873164
2	8:9284253:C:T	rs67172995	8	9284253	4.8702e-08	9246431	9330433	57	1	rs67172995	1	rs67172995

## Sheet: PLINK LVMi - Lead SNVs
List of lead SNVs from a traditional FUMA GWAS on left ventricular mass index (LVMi) using PLINK and the genome-wide significance threshold of p = 5E-8 and LD threshold of r2 = 0.1. Genomic Locus: unique locus identifier (note: multiple independent lead SNVs can be assigned to the same genomic locus) uniqID: unique identifier of the SNV, defined as chr:hg19 position:allele1:allele2 where alleles …
GenomicLocus	uniqID	rsID	chr	pos	p	nIndSigSNVs	IndSigSNVs
1	2:179562999:C:CTTAG	rs3045696	2	179562999	1.46243e-13	8	rs3045696;rs62178977;rs10178003;rs12622500;rs73973171;rs7591091;rs1863671;rs967507
1	2:179753549:A:G	rs1873164	2	179753549	1.24051e-10	4	rs1873164;rs7591091;rs12622500;rs73973171
2	8:9284253:C:T	rs67172995	8	9284253	4.8702e-08	1	rs67172995

## Sheet: PLINK LVMi - Ind Sig SNVs
List of independent significant variants from a traditional FUMA GWAS on left ventricular mass index (LVMi) using PLINK and the genome-wide significance threshold of p = 5E-8 and an LD threshold of r2 = 0.6. Genomic Locus: unique locus identifier (note: multiple independent lead SNVs can be assigned to the same genomic locus) uniqID: unique identifier of the SNV, defined as chr:hg19 position:alle…
GenomicLocus	uniqID	rsID	chr	pos	p	nGWASSNVs
1	2:179342330:C:T	rs1863671	2	179342330	2.21478e-08	52
1	2:179367086:A:G	rs967507	2	179367086	2.20805e-12	45
1	2:179562999:C:CTTAG	rs3045696	2	179562999	1.46243e-13	46
1	2:179582162:C:T	rs62178977	2	179582162	7.06189e-10	56
1	2:179684466:A:C	rs10178003	2	179684466	3.41611e-09	3
1	2:179713329:C:G	rs12622500	2	179713329	1.49422e-10	23
1	2:179722521:A:G	rs73973171	2	179722521	1.15312e-09	14
1	2:179753549:A:G	rs1873164	2	179753549	1.24051e-10	16
1	2:179754194:C:T	rs7591091	2	179754194	3.67172e-11	3
2	8:9284253:C:T	rs67172995	8	9284253	4.8702e-08	57

## Sheet: PLINK LVMi - Mapped Genes
List of genes functionally mapped to genome-wide significant loci (via positional mapping) from the traditional FUMA GWAS study on left ventricular mass index (LVMi) using PLINK. ensg: ENSG identifier symbol: gene symbol chr: chromosome start: hg19 start position of the gene end: hg19 end position of the gene strand: strand of the gene type: gene biotype from Ensembl entrezID: entrez identifier (…
ensg	symbol	chr	start	end	strand	type	entrezID	HUGO	pLI	ncRVIS	posMapSNVs	posMapMaxCADD	minGwasP	IndSigSNVs	GenomicLocus
ENSG00000128655	PDE11A	2	178487980	178973066	-1	protein_coding	50940	PDE11A	4.16725e-31	1.15977	0	0	2.25555e-10	rs967507;rs1863671:rs1863671:rs967507	1
ENSG00000155636	RBM45	2	178977151	179003738	1	protein_coding	129831	RBM45	0.000125349	-0.549454	0	0	2.25555e-10	rs967507;rs1863671:rs1863671:rs967507	1
ENSG00000180228	PRKRA	2	179296141	179316239	-1	protein_coding	8575	PRKRA	0.154542	1.65172	25	12.87	2.20805e-12	rs967507;rs1863671;rs1863671:rs967507:rs1863671:rs3045696:rs3045696;rs967507:rs62178977:rs3045696;rs62178977	1
ENSG00000204311	DFNB59	2	179316163	179326117	1	protein_coding	494513	DFNB59	1.07044e-05	-0.00220031	16	11.3	2.20805e-12	rs1863671;rs967507;rs1863671:rs967507:rs1863671:rs3045696:rs3045696;rs967507:rs62178977:rs3045696;rs62178977	1
ENSG00000079150	FKBP7	2	179328391	179343327	-1	protein_coding	51661	FKBP7	3.15602e-05	-1.11758	21	12.02	3.60697e-11	rs967507;rs1863671	1
ENSG00000116095	PLEKHA3	2	179345195	179381189	1	protein_coding	65977	PLEKHA3	0.0229787	-0.310486	35	14.32	2.20805e-12	rs967507;rs1863671;rs3045696;rs62178977	1
ENSG00000155657	TTN	2	179390716	179695529	-1	protein_coding	7273	TTN	1.21111e-32	-0.562315	94	19.08	1.46243e-13	rs3045696;rs967507;rs62178977;rs12622500;rs10178003;rs7591091;rs73973171;rs62178977:rs3045696;rs62178977:rs12622500:rs10178003:rs73973171:rs1873164:rs7591091	1
ENSG00000163492	CCDC141	2	179694484	179914813	-1	protein_coding	285025	CCDC141	1.42762e-09	NA	41	17.71	3.67172e-11	rs12622500;rs7591091;rs73973171;rs1873164;rs62178977:rs3045696;rs62178977:rs12622500:rs10178003:rs7591091:rs12622500;rs73973171:rs1873164:rs73973171	1
ENSG00000173273	TNKS	8	9413424	9639856	1	protein_coding	8658	TNKS	0.777116	1.63727	0	0	6.07739e-07	rs67172995	2

## Sheet: BOLT-LMM LVMi - Risk Loci
List of left ventricular mass index (LVMi) risk loci prioritized from a traditional FUMA GWAS study using BOLT-LMM with a genome-wide significance threshold of p = 5E-8. Genomic Locus: unique locus identifier uniqID: unique identifier of the SNV, defined as chr:hg19 position:allele1:allele2 where alleles are alphabetically ordered rsID: rsID of the top lead SNV for the given genomic locus chr: ch…
GenomicLocus	uniqID	rsID	chr	pos	p	start	end	nGWASSNVs	nIndSigSNVs	IndSigSNVs	nLeadSNVs	LeadSNVs
1	2:179562999:C:CTTAG	rs3045696	2	179562999	2.3e-13	179284643	179847371	208	9	rs3045696;rs62178977;rs10178003;rs12622500;rs73973171;rs7591091;rs967507;rs1873164;rs6750760	2	rs3045696;rs1873164
2	3:6313907:A:G	rs140838872	3	6313907	4.9e-08	6313907	6313907	1	1	rs140838872	1	rs140838872
3	5:138591391:A:G	rs147452390	5	138591391	2.7e-08	138591391	138591391	1	1	rs147452390	1	rs147452390

## Sheet: BOLT-LMM LVMi - Lead SNVs
List of lead SNVs from a traditional FUMA GWAS on left ventricular mass index (LVMi) using BOLT-LMM and the genome-wide significance threshold of p = 5E-8 and LD threshold of r2 = 0.1. Genomic Locus: unique locus identifier (note: multiple independent lead SNVs can be assigned to the same genomic locus) uniqID: unique identifier of the SNV, defined as chr:hg19 position:allele1:allele2 where allel…
GenomicLocus	uniqID	rsID	chr	pos	p	nIndSigSNVs	IndSigSNVs
1	2:179562999:C:CTTAG	rs3045696	2	179562999	2.3e-13	7	rs3045696;rs62178977;rs10178003;rs12622500;rs73973171;rs7591091;rs967507
1	2:179753549:A:G	rs1873164	2	179753549	2.2e-10	5	rs1873164;rs7591091;rs6750760;rs12622500;rs73973171
2	3:6313907:A:G	rs140838872	3	6313907	4.9e-08	1	rs140838872
3	5:138591391:A:G	rs147452390	5	138591391	2.7e-08	1	rs147452390

## Sheet: BOLT-LMM LVMi - Ind Sig SNVs
List of independent significant variants from a traditional FUMA GWAS on left ventricular mass index (LVMi) using BOLT-LMM and the genome-wide significance threshold of p = 5E-8 and an LD threshold of r2 = 0.6. Genomic Locus: unique locus identifier (note: multiple independent lead SNVs can be assigned to the same genomic locus) uniqID: unique identifier of the SNV, defined as chr:hg19 position:a…
GenomicLocus	uniqID	rsID	chr	pos	p	nGWASSNVs
1	2:179367086:A:G	rs967507	2	179367086	4.1e-12	45
1	2:179562999:C:CTTAG	rs3045696	2	179562999	2.3e-13	46
1	2:179582162:C:T	rs62178977	2	179582162	1.4e-09	55
1	2:179684466:A:C	rs10178003	2	179684466	2.8e-09	3
1	2:179713329:C:G	rs12622500	2	179713329	3.6e-10	23
1	2:179722521:A:G	rs73973171	2	179722521	3.8e-09	14
1	2:179753549:A:G	rs1873164	2	179753549	2.2e-10	16
1	2:179754194:C:T	rs7591091	2	179754194	2.5e-11	3
1	2:179759810:A:G	rs6750760	2	179759810	3.6e-08	38
2	3:6313907:A:G	rs140838872	3	6313907	4.9e-08	1
3	5:138591391:A:G	rs147452390	5	138591391	2.7e-08	1

## Sheet: BOLT-LMM LVMi - Mapped Genes
List of genes functionally mapped to genome-wide significant loci (via positional mapping) from the traditional FUMA GWAS study on left ventricular mass index (LVMi) using BOLT-LMM. ensg: ENSG identifier symbol: gene symbol chr: chromosome start: hg19 start position of the gene end: hg19 end position of the gene strand: strand of the gene type: gene biotype from Ensembl entrezID: entrez identifie…
ensg	symbol	chr	start	end	strand	type	entrezID	HUGO	pLI	ncRVIS	posMapSNVs	posMapMaxCADD	minGwasP	IndSigSNVs	GenomicLocus
ENSG00000180228	PRKRA	2	179296141	179316239	-1	protein_coding	8575	PRKRA	0.154542	1.65172	15	12.87	4.8e-10	rs967507	1
ENSG00000204311	DFNB59	2	179316163	179326117	1	protein_coding	494513	DFNB59	1.07044e-05	-0.00220031	11	11.3	3.9e-10	rs967507	1
ENSG00000079150	FKBP7	2	179328391	179343327	-1	protein_coding	51661	FKBP7	3.15602e-05	-1.11758	20	12.02	4.7e-11	rs967507	1
ENSG00000116095	PLEKHA3	2	179345195	179381189	1	protein_coding	65977	PLEKHA3	0.0229787	-0.310486	33	14.32	4.1e-12	rs967507;rs3045696;rs62178977	1
ENSG00000155657	TTN	2	179390716	179695529	-1	protein_coding	7273	TTN	1.21111e-32	-0.562315	93	19.08	2.3e-13	rs3045696;rs967507;rs62178977;rs12622500;rs10178003;rs7591091;rs73973171	1
ENSG00000163492	CCDC141	2	179694484	179914813	-1	protein_coding	285025	CCDC141	1.42762e-09	NA	79	17.71	2.5e-11	rs12622500;rs7591091;rs73973171;rs1873164;rs6750760	1
ENSG00000120725	SIL1	5	138282409	138629246	-1	protein_coding	64374	SIL1	0.000933875	NA	1	0.149	2.7e-08	rs147452390	3

## Sheet: PLINK LVM - Risk Loci
List of left ventricular mass (LVM) risk loci prioritized from a traditional FUMA GWAS study using PLINK with a genome-wide significance threshold of p = 5E-8. Genomic Locus: unique locus identifier uniqID: unique identifier of the SNV, defined as chr:hg19 position:allele1:allele2 where alleles are alphabetically ordered rsID: rsID of the top lead SNV for the given genomic locus chr: chromosome o…
GenomicLocus	uniqID	rsID	chr	pos	p	start	end	nGWASSNVs	nIndSigSNVs	IndSigSNVs	nLeadSNVs	LeadSNVs
1	2:179562999:C:CTTAG	rs3045696	2	179562999	1.06959e-12	179284643	179793839	185	9	rs3045696;rs12997957;rs10178003;rs12622500;rs76580576;rs7591091;rs1863671;rs967507;rs1873164	2	rs3045696;rs1873164
2	8:9284253:C:T	rs67172995	8	9284253	3.10421e-08	9246431	9330433	57	1	rs67172995	1	rs67172995

## Sheet: PLINK LVM - Lead SNVs
List of lead SNVs from a traditional FUMA GWAS on left ventricular mass (LVM) using PLINK and the genome-wide significance threshold of p = 5E-8 and LD threshold of r2 = 0.1. Genomic Locus: unique locus identifier (note: multiple independent lead SNVs can be assigned to the same genomic locus) uniqID: unique identifier of the SNV, defined as chr:hg19 position:allele1:allele2 where alleles are alp…
GenomicLocus	uniqID	rsID	chr	pos	p	nIndSigSNVs	IndSigSNVs
1	2:179562999:C:CTTAG	rs3045696	2	179562999	1.06959e-12	8	rs3045696;rs12997957;rs10178003;rs12622500;rs76580576;rs7591091;rs1863671;rs967507
1	2:179753549:A:G	rs1873164	2	179753549	1.29093e-10	4	rs1873164;rs7591091;rs12622500;rs76580576
2	8:9284253:C:T	rs67172995	8	9284253	3.10421e-08	1	rs67172995

[truncated: 6 more sheets: PLINK LVM - Ind Sig SNVs, PLINK LVM - Mapped Genes, BOLT-LMM LVM - Risk Loci, BOLT-LMM LVM - Lead SNVs, BOLT-LMM LVM - Ind Sig SNVs, BOLT-LMM LVM - Mapped Genes]
